# Supplementary material for: Effectiveness and response differences of a multidisciplinary workplace health promotion program for healthcare workers
Source: PubMed Central journal article supplement (PMC9360800; doi:10.3389/fmed.2022.930165), 2022-07-26
Supplement: Data_Sheet_1.pdf [file Data_Sheet_1.pdf]

## Supplementary Tables

**Supplementary Table 1** | Changes in outcome parameters for whole cohort ( $n = 281$ ).

| Variable                             | Pre-intervention | Post-intervention | Change <sup>1</sup> | $p$ -Value <sup>2</sup> |
|--------------------------------------|------------------|-------------------|---------------------|-------------------------|
| <b>Anthropometrics</b>               |                  |                   |                     |                         |
| Body mass index (kg/m <sup>2</sup> ) | 22.4 (20.8–24.5) | 22.2 (20.5–24.3)  | -0.19 (-0.60–0.17)  | < 0.001                 |
| Waist circumference (cm)             | 74 (69–80)       | 74 (68–79)        | -1 (-4–3)           | 0.011                   |
| Waist-hip ratio                      | 79.5 (75.3–84.2) | 78.5 (74.4–83.4)  | -1.0 (-4.0–2.0)     | < 0.001                 |
| Waist-to-height ratio                | 46.8 (43.3–50.5) | 46.2 (42.7–50.0)  | -0.9 (-2.6–1.5)     | 0.001                   |
| <b>Body composition</b>              |                  |                   |                     |                         |
| Body fat percentage (%)              | 30.0 (4.6)       | 29.4 (4.7)        | -0.65 (1.15)        | < 0.001                 |
| Muscle weight (kg)                   | 36.1 (33.9–38.7) | 36.3 (33.9–38.7)  | 0.2 (-0.3–0.6)      | < 0.001                 |
| Visceral fat area (cm <sup>2</sup> ) | 57.0 (41.0–77.0) | 3.0 (37.0–75.0)   | -3.0 (-7.0–0.0)     | < 0.001                 |
| <b>Physical fitness</b>              |                  |                   |                     |                         |
| Grip strength (kg)                   | 27.0 (23.0–30.0) | 27.0 (24.0–30.5)  | 0.0 (-2.0–2.0)      | 0.074                   |
| High jump (cm)                       | 32.0 (27.0–36.0) | 33.0 (29.0–37.0)  | 2.0 (-1.0–4.0)      | < 0.001                 |
| Sit-up (count)                       | 26 (20–32)       | 28 (22–34)        | 2 (0–4)             | < 0.001                 |
| Sit-and-reach (cm)                   | 32.8 (27.6–38.8) | 32.8 (27.9–38.1)  | 0.1 (-1.9–2.2)      | 0.473                   |
| Step test                            | 58.4 (53.9–64.7) | 60.8 (56.3–67.2)  | 2.0 (-2.6–6.3)      | < 0.001                 |

Data are summarized as mean (standard deviation) or median (interquartile range), as appropriate. <sup>1</sup>Post-intervention minus pre-intervention; <sup>2</sup>Paired sample  $t$ -test for normally distributed continuous variables or Wilcoxon signed rank test.

**Supplementary Table 2 |** Changes in outcome parameters stratified by age, weight status, and shiftwork status.

| Variable                             | Age < 40 years     | Age ≥ 40 years     | p-Value <sup>1</sup> | Non-overweight     | Overweight         | p-Value <sup>1</sup> | Non-shift worker   | Shift worker       | p-Value <sup>1</sup> |
|--------------------------------------|--------------------|--------------------|----------------------|--------------------|--------------------|----------------------|--------------------|--------------------|----------------------|
| <b>Anthropometrics</b>               |                    |                    |                      |                    |                    |                      |                    |                    |                      |
| Body mass index (kg/m <sup>2</sup> ) | -0.2<br>(-0.6–0.2) | -0.2<br>(-0.6–0.2) | 0.357                | -0.2<br>(-0.5–0.1) | -0.2<br>(-0.8–0.3) | 0.877                | -0.1<br>(-0.6–0.2) | -0.3<br>(-0.6–0.0) | 0.040                |
| Waist circumference (cm)             | -1<br>(-4–2)       | -1<br>(-4–3)       | 0.279                | -1<br>(-4–3)       | -1<br>(-4–2)       | 0.651                | -1<br>(-4–3)       | -1<br>(-4–3)       | 0.704                |
| Waist-hip ratio                      | -1.2<br>(-4.3–1.7) | -0.8<br>(-3.3–3.2) | 0.123                | -1.0<br>(-4.1–2.1) | -1.0<br>(-4.0–1.7) | 0.801                | -1.5<br>(-4.7–2.1) | -0.8<br>(-3.3–1.7) | 0.287                |
| Waist-to-height ratio                | -0.8<br>(-2.6–1.2) | -0.1<br>(-2.6–1.8) | 0.321                | -0.8<br>(-2.6–1.7) | -1.0<br>(-2.6–1.3) | 0.639                | -0.9<br>(-2.6–1.5) | -0.7<br>(-2.5–1.4) | 0.643                |
| <b>Body composition</b>              |                    |                    |                      |                    |                    |                      |                    |                    |                      |
| Body fat percentage (%)              | -0.7<br>(-1.3–0.1) | -0.6<br>(-1.2–0.1) | 0.427                | -0.7<br>(-1.4–0.1) | -0.6<br>(-1.1–0.1) | 0.272                | -0.7<br>(-1.3–0.1) | -0.5<br>(-1.3–1.3) | 0.922                |
| Muscle weight (kg)                   | 0.1<br>(-0.4–0.6)  | 0.3<br>(-0.2–0.7)  | 0.168                | 0.2<br>(-0.3–0.6)  | 0.1<br>(-0.4–0.7)  | 0.914                | 0.2<br>(-0.3–0.7)  | 0.2<br>(-0.4–0.5)  | 0.277                |
| Visceral fat area (cm <sup>2</sup> ) | -2.0<br>(-6.0–0.0) | -4.0<br>(-8.0–1.0) | 0.294                | -2.0<br>(-6.0–0.0) | -4.0<br>(-8.0–1.0) | 0.357                | -3.0<br>(-7.0–0.0) | -2.0<br>(-7.0–1.0) | 0.350                |
| <b>Physical fitness</b>              |                    |                    |                      |                    |                    |                      |                    |                    |                      |
| Grip strength (kg)                   | 0.0<br>(-1.3–2.0)  | 0.0<br>(-2.0–2.0)  | 0.868                | 0.0<br>(-1.3–2.0)  | 0.0<br>(-2.0–2.0)  | 0.556                | 0.0<br>(-2.0–2.0)  | 0.0<br>(-2.0–2.0)  | 0.579                |
| High jump (cm)                       | 2.0<br>(-1.0–4.0)  | 2.0<br>(-1.0–4.0)  | 0.779                | 1.0<br>(-1.0–4.0)  | 2.0<br>(-1.0–4.0)  | 0.973                | 2.0<br>(-1.0–4.0)  | 1.2<br>(-1.0–4.0)  | 0.222                |
| Sit-up (count)                       | 2<br>(0–4)         | 2<br>(0–4)         | 0.978                | 2<br>(0–4)         | 2<br>(0–4)         | 0.724                | 2<br>(0–4)         | 3<br>(0–5)         | 0.666                |
| Sit-and-reach (cm)                   | 0.1<br>(-1.8–2.0)  | 0.0<br>(-2.1–3.0)  | 0.592                | 0.1<br>(-2.1–1.9)  | 0.2<br>(-1.7–2.3)  | 0.371                | -0.1<br>(-2.1–2.2) | 0.3<br>(-1.8–2.3)  | 0.856                |
| Step test                            | 2.2<br>(-2.2–6.3)  | 1.5<br>(-3.1–6.6)  | 0.745                | 1.6<br>(-2.8–6.4)  | 2.9<br>(-1.9–6.1)  | 0.498                | 2.0<br>(-2.6–6.8)  | 2.5<br>(-2.8–5.6)  | 0.449                |

Data are summarized as change (95% confidence interval). <sup>1</sup>The difference in change (post-intervention minus pre-intervention) between age, weight or shiftwork subgroups obtained from generalized estimating equation analyses adjusted for age, BMI at pre-intervention, profession, and shiftwork status.

# 何謂『健康體適能』?

- 健康體適能之優點：
  - 1 促進身心健康。
  - 2 增進工作效率。
  - 3 預防各種疾病。
  - 4 提升生活品質。
- 健康體適能之 4 大要素：
  - 心肺耐力**
    - 指個人的肺臟與心臟將氧氣輸送到組織細胞加以使用的能力。
    - 檢測方式：3 分鐘登階
  - 身體組成**
    - 體內脂肪與非脂肪組織的相對比例。
    - 檢測方式：身高、體重、腰圍及身體組成儀。
  - 柔軟度**
    - 各關節所能伸展活動的最大範圍。
    - 檢測方式：坐姿體前彎
  - 肌力肌耐力**
    - 肌力：肌肉在一次收縮時所產生的最大力量。
    - 肌耐力：肌肉維持某負荷時，能持續用力的時間或反覆次數。
    - 檢測方式：握力、屈膝仰臥起坐

歡迎加入我們使您更了解您的體能狀況！

員工健康促進小組 關  您的健康

服務專線：分機 403-3532；公務機 0975367044 / 0975367144  
資料來源：教育部體育署

Supplementary Figure 1 | Educational material about healthy PF.

# 舒緩筋骨 上半身 只要2分半!

P.S 每個動作做到些微緊繃感即可，切勿感到疼痛喔！

## 肩頸

- 面向前方，左手輕輕碰到右耳，向左輕壓
- 10-15秒後換邊
- 伸展斜方肌與頸部側邊肌群

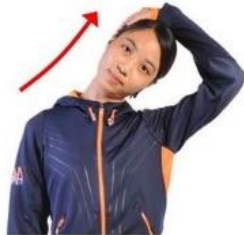

## 前臂

- 將手臂伸直，掌心朝下，另一手扣住手背輕輕往下壓
- 10-15秒後換邊
- 伸展前臂伸肌群

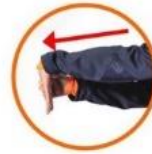

- 將手臂伸直，掌心朝上，另一手扣住手掌輕輕往下壓
- 10-15秒後換邊
- 伸展前臂屈肌群

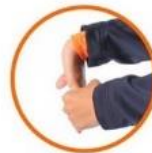

## 胸部

- 抬頭挺胸，雙手於背後十指交扣，輕輕向後向上抬昇
- 持續10-15秒
- 伸展胸大肌與三角肌

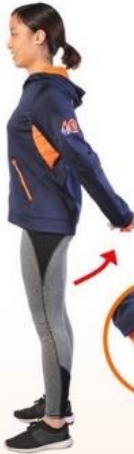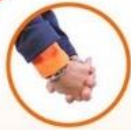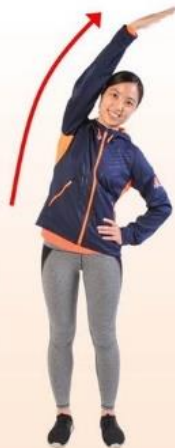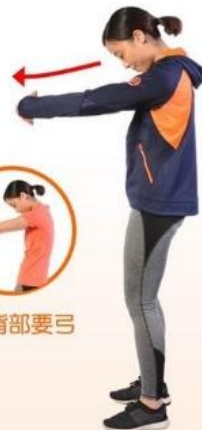

Tip 背部要弓

## 體側肌群

- 手向上延伸，往正側邊傾斜
- 10-15秒後換邊
- 伸展腹外斜肌

## 背部

- 雙手十指交扣向前延伸，想像抱著一顆大球，背部慢慢向後延伸
- 持續10-15秒
- 伸展闊背肌、中斜方肌、菱形肌

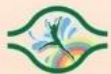

員工健康促進小組 關♥您的健康

服務專線：403-3532 公務機：0975367044 / 0975367144

資料來源：教育部體育署

Supplementary Figure 2 | Educational material about stretching exercise.

# 舒緩筋骨 下半身 只要2分鐘!

P.S 每個動作做到些微緊繃感即可，切勿感到疼痛喔！

## 臀部

- 右腳踝平放在左膝上方，雙手自然放置，背打直，身體慢慢向前傾
- 10-15秒後換邊
- 伸展臀大肌

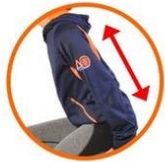

Tip 背部打直

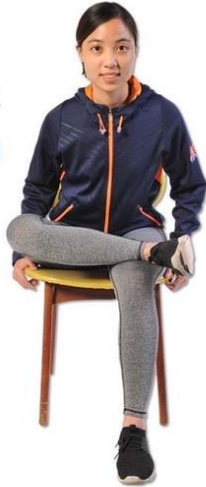

## 腿後

- 伸長左腿，腳尖勾起，雙手自然放置，背部打直，身體慢慢向前傾
- 10-15秒換邊
- 伸展腿後腿肌群

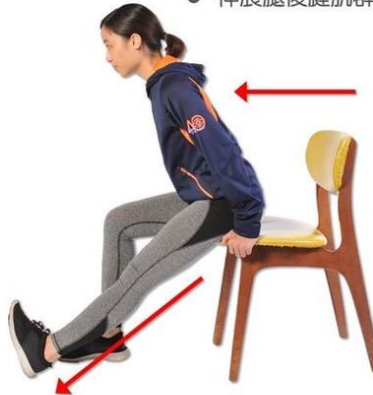

## 小腿後側

- 雙手扶在牆面，右腳腳掌踩穩地面，左腳前腳掌踩在牆上
- 10-15秒後換邊
- 伸展比目魚肌及腓腸肌

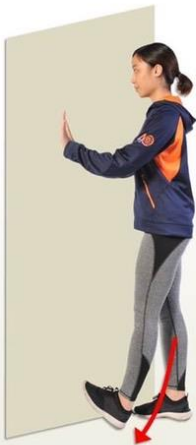

## 大腿前側

- 坐姿兩腳張開，先轉向右側，雙腳腳尖朝向同一方向，左腿伸直延展
- 10-15秒後換邊
- 伸展髂腰肌及股四頭肌

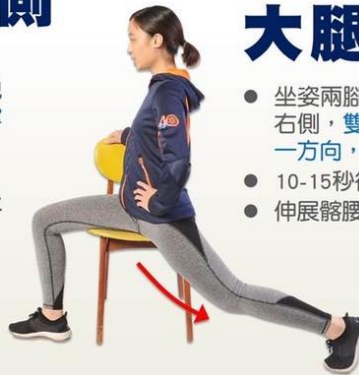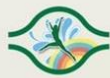

員工健康促進小組 關♥您的健康

服務專線：403-3532 公務機：0975367044 / 0975367144

資料來源：教育部體育署

Supplementary Figure 3 | Educational material about stretching exercise.

# 運動飲食輕鬆吃

對於減重而言，飲食控制搭配運動是最好的組合，在飲食方面，分作3個時期：  
：運動前、中、後。

**STEP 3**

**運動後30分鐘內**  
補充300大卡左右的食物，  
醣類：蛋白質 = 3：1。

**STEP 2**

**運動中應及時補充水分**  
每隔15-20分鐘，補充150c.c.白開水。

**STEP 1**

**運動前應食用少量食物**  
運動1小時前，補充低GI的醣類食物。

| 食物的升糖指數(GI)對照表 |          |      |            |      |          |
|----------------|----------|------|------------|------|----------|
| 食物             | 高GI(>70) | 食物   | 中GI(55-70) | 食物   | 低GI(<55) |
| 運動飲料           | 95       | 烤馬鈴薯 | 60         | 燕麥   | 49       |
| 糯米             | 88       | 馬芬蛋糕 | 62         | 番薯   | 48       |
| 蜂蜜             | 87       | 再來米  | 59         | 義大利麵 | 41       |
| 全麥麵包           | 72       | 玉米   | 55         | 蘋果   | 39       |
| 白麵包            | 70       | 成熟香蕉 | 52         | 牛奶   | 34       |
| 貝果             | 73       | 奇異果  | 53         | 優格   | 36       |

- 升糖指數(GI)：衡量醣類對血糖量的影響，意即攝取GI值越高的食物，會在短時間內使人體的血糖上升較快速，也易囤積脂肪造成肥胖。
- 以葡萄糖(GI=100)作為GI食物對照之參考指標。
- 食物的升糖指數會因不同食物來源地、品種、成熟度及烹調加工方式等而有差異。

員工健康促進團隊 關♥您的健康

Supplementary Figure 4 | Educational material about diet and exercise for weight management.
